# Supplementary material for: Factors affecting IgG4-mediated complement activation
Source: PubMed Central journal article supplement (PMC9910309; doi:10.3389/fimmu.2023.1087532), 2023-01-26
Supplement: DataSheet_1.pdf [file DataSheet_1.pdf]

**Table S1.** IgG glycopeptides included in the final analyte list. H: hexose, N: N-acetylhexosamine, F: fucose, S: N-acetylneuraminic acid (sialic acid). The theoretical  $m/z$  values of monoisotopic peaks are given.

| Glycan composition | IgG Subclass | [M+3H] <sup>3+</sup> |
|--------------------|--------------|----------------------|
| IgGIVH5N2          | IgG4         | 797,3182             |
| IgGIVH3N3F1        | IgG4         | 805,6621             |
| IgGIVH3N4          | IgG4         | 824,6692             |
| IgGIVH4N3F1        | IgG4         | 859,6797             |
| IgGIVH5N3          | IgG4         | 865,0113             |
| IgGIVH3N4F1        | IgG4         | 873,3552             |
| IgGIVH5N3F1        | IgG4         | 913,6973             |
| IgGIVH6N3          | IgG4         | 919,0289             |
| IgGIVH4N4F1        | IgG4         | 927,3728             |
| IgGIVH5N4          | IgG4         | 932,7044             |
| IgGIVH3N5F1        | IgG4         | 941,0483             |
| IgGIVH4N3F1S1      | IgG4         | 956,7115             |
| IgGIVH5N3F2        | IgG4         | 962,3832             |
| IgGIVH6N3F1        | IgG4         | 967,7149             |
| IgGIVH4N4F2        | IgG4         | 976,0588             |
| IgGIVH5N4F1        | IgG4         | 981,3904             |
| IgGIVH6N4          | IgG4         | 986,7220             |
| IgGIVH4N5F1        | IgG4         | 995,0659             |
| IgGIVH3N6F1        | IgG4         | 1008,7414            |
| IgGIVH5N3F1S1      | IgG4         | 1010,7291            |
| IgGIVH6N3S1        | IgG4         | 1016,0607            |
| IgGIVH4N4F1S1      | IgG4         | 1024,4046            |
| IgGIVH5N4F2        | IgG4         | 1030,0764            |
| IgGIVH6N4F1        | IgG4         | 1035,4080            |
| IgGIVH5N5F1        | IgG4         | 1049,0835            |
| IgGIVH6N3F1S1      | IgG4         | 1064,7467            |
| IgGIVH5N4F1S1      | IgG4         | 1078,4222            |
| IgGIVH6N4S1        | IgG4         | 1083,7538            |
| IgGIVH4N5F1S1      | IgG4         | 1092,0977            |
| IgGIVH6N5F1        | IgG4         | 1103,1011            |
| IgGIVH5N4F2S1      | IgG4         | 1127,1082            |
| IgGIVH5N4F1S2      | IgG4         | 1175,4540            |

**Table S2.** IgG glycopeptides included in the final analyte list for the anti-biotin antibodies

| Glycan composition | IgG Subclass | [M+1H] <sup>1+</sup> | [M+2H] <sup>2+</sup> | [M+3H] <sup>3+</sup> | [M+4H] <sup>4+</sup> |
|--------------------|--------------|----------------------|----------------------|----------------------|----------------------|
| IgG1H3N3           | IgG1         | 2284,9086            | 1142,9579            | 762,3077             | 571,9826             |
| IgG1H3N4           | IgG1         | 2487,9880            | 1244,4976            | 830,0008             | 622,7524             |
| IgG1H4N3           | IgG1         | 2446,9614            | 1223,9843            | 816,3253             | 612,4958             |
| IgG1H4N4           | IgG1         | 2650,0408            | 1325,5240            | 884,0184             | 663,2657             |
| IgG1H5N4           | IgG1         | 2812,0936            | 1406,5504            | 938,0361             | 703,7789             |
| IgG1H3N3F1         | IgG1         | 2430,9665            | 1215,9869            | 810,9937             | 608,4971             |
| IgG1H3N4F1         | IgG1         | 2634,0459            | 1317,5266            | 878,6868             | 659,2669             |
| IgG1H4N3F1         | IgG1         | 2593,0193            | 1297,0133            | 865,0113             | 649,0103             |
| IgG1H4N4F1         | IgG1         | 2796,0987            | 1398,5530            | 932,7044             | 699,7801             |
| IgG1H5N3F1         | IgG1         | 2755,0722            | 1378,0397            | 919,0289             | 689,5235             |
| IgG1H5N4F1         | IgG1         | 2958,1515            | 1479,5794            | 986,7220             | 740,2933             |
| IgG1H3N5F1         | IgG1         | 2837,1253            | 1419,0663            | 946,3799             | 710,0368             |
| IgG1H4N5F1         | IgG1         | 2999,1781            | 1500,0927            | 1000,3975            | 750,5500             |
| IgG1H3N3F1S1       | IgG1         | 2722,0619            | 1361,5346            | 908,0255             | 681,2709             |
| IgG1H4N3F1S1       | IgG1         | 2884,1147            | 1442,5610            | 962,0431             | 721,7841             |
| IgG1H5N3F1S1       | IgG1         | 3046,1676            | 1523,5874            | 1016,0607            | 762,2973             |
| IgG1H4N4F1S1       | IgG1         | 3087,1941            | 1544,1007            | 1029,7362            | 772,5540             |
| IgG1H5N4F1S1       | IgG1         | 3249,2469            | 1625,1271            | 1083,7538            | 813,0672             |
| IgG1H5N4F1S2       | IgG1         | 3540,3424            | 1770,6748            | 1180,7856            | 885,8410             |
| IgG1H5N5F1S2       | IgG1         | 3743,4217            | 1872,2145            | 1248,4788            | 936,6109             |
| IgG1H5N2           | IgG1         | 2405,9349            | 1203,4711            | 802,6498             | 602,2392             |
| IgG1H6N2           | IgG1         | 2567,9877            | 1284,4975            | 856,6674             | 642,7524             |
| IgG1H7N2           | IgG1         | 2730,0405            | 1365,5239            | 910,6850             | 683,2656             |
| IgG4V1H3N3         | IgG4         | 2268,9137            | 1134,9605            | 756,9761             | 567,9839             |
| IgG4V1H3N4         | IgG4         | 2471,9931            | 1236,5002            | 824,6692             | 618,7537             |
| IgG4V1H4N3         | IgG4         | 2430,9665            | 1215,9869            | 810,9937             | 608,4971             |
| IgG4V1H4N4         | IgG4         | 2634,0459            | 1317,5266            | 878,6868             | 659,2669             |
| IgG4V1H5N4         | IgG4         | 2796,0987            | 1398,5530            | 932,7044             | 699,7801             |
| IgG4V1H3N3F1       | IgG4         | 2414,9716            | 1207,9894            | 805,6621             | 604,4984             |
| IgG4V1H3N4F1       | IgG4         | 2618,0510            | 1309,5291            | 873,3552             | 655,2682             |
| IgG4V1H4N3F1       | IgG4         | 2577,0244            | 1289,0159            | 859,6797             | 645,0116             |
| IgG4V1H4N4F1       | IgG4         | 2780,1038            | 1390,5555            | 927,3728             | 695,7814             |
| IgG4V1H5N3F1       | IgG4         | 2739,0773            | 1370,0423            | 913,6973             | 685,5248             |
| IgG4V1H5N4F1       | IgG4         | 2942,1566            | 1471,5820            | 981,3904             | 736,2946             |
| IgG4V1H3N5F1       | IgG4         | 2821,1304            | 1411,0688            | 941,0483             | 706,0380             |
| IgG4V1H4N5F1       | IgG4         | 2983,1832            | 1492,0952            | 995,0659             | 746,5513             |
| IgG4V1H3N3F1S1     | IgG4         | 2706,0670            | 1353,5371            | 902,6939             | 677,2722             |
| IgG4V1H4N3F1S1     | IgG4         | 2868,1198            | 1434,5636            | 956,7115             | 717,7854             |
| IgG4V1H5N3F1S1     | IgG4         | 3030,1727            | 1515,5900            | 1010,7291            | 758,2986             |
| IgG4V1H4N4F1S1     | IgG4         | 3071,1992            | 1536,1032            | 1024,4046            | 768,5553             |
| IgG4V1H5N4F1S1     | IgG4         | 3233,2520            | 1617,1297            | 1078,4222            | 809,0685             |
| IgG4V1H5N4F1S2     | IgG4         | 3524,3475            | 1762,6774            | 1175,4540            | 881,8423             |
| IgG4V1H5N5F1S2     | IgG4         | 3727,4268            | 1864,2171            | 1243,1471            | 932,6122             |
| IgG4V1H5N2         | IgG4         | 2389,9400            | 1195,4736            | 797,3182             | 598,2404             |
| IgG4V1H6N2         | IgG4         | 2551,9928            | 1276,5000            | 851,3358             | 638,7537             |
| IgG4V1H7N2         | IgG4         | 2714,0456            | 1357,5264            | 905,3534             | 679,2669             |

**Table S3.** Description and calculation of IgG glycosylation traits. H: hexose, N: N-acetylhexosamine, F: fucose, S: N-acetylneuraminic (sialic) acid

|                             | <b>Description</b>                                                     | <b>Formula</b>                                                                                                                                                   |
|-----------------------------|------------------------------------------------------------------------|------------------------------------------------------------------------------------------------------------------------------------------------------------------|
| <b>IgG1 bisection</b>       | <i>N</i> -glycans carrying a bisected <i>N</i> -acetylglucoseamine     | $( H5N5F1S1 + H4N5F1 + H5N5F1 ) / \text{sum of all IgG1 glycopeptides}$                                                                                          |
| <b>IgG1 galactosylation</b> | <i>N</i> -glycans carrying galactose(s)                                | $( 1/2 * ( H4N4 + H4N4F1 + H4N5F1 + H4N4F1S1 ) + 2/2 * ( H5N4 + H5N4F1 + H5N4S1 + H5N5F1S1 + H5N4F1S2 + H5N5F1 + H5N4F1S1 ) ) / \text{sum of all glycopeptides}$ |
| <b>IgG1 sialylation</b>     | <i>N</i> -glycans carrying <i>N</i> -acetylneuraminic (sialic) acid(s) | $( 1/2 * ( H5N4S1 + H5N5F1S1 + H4N4F1S1 ) + 2/2 * H5N4F1S2 ) / \text{sum of all IgG1 glycopeptides}$                                                             |
| <b>IgG1 fucosylation</b>    | <i>N</i> -glycans carrying a core fucose                               | $( H3N4F1 + H4N4F1 + H5N4F1 + H5N5F1S1 + H5N4F1S2 + H4N5F1 + H4N4F1S1 + H5N5F1S1 + H5N4F1S1 ) / \text{sum of all IgG1 glycopeptides}$                            |

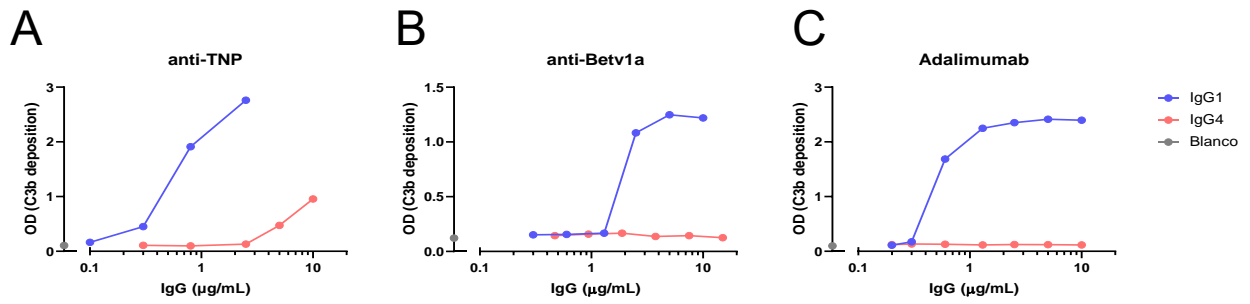

**Supplement figure 1. No IgG4-mediated complement activation observed in presence of protein antigens.** C3b deposition by (A) anti- anti-trinitrophenyl (TNP), (B) anti-Betv1a and (C) adalimumab IgG1 and IgG4 in the presence of human serum albumin (HSA)-TNP (1 mM; 10 µg/mL), Betv1a (5 µg/mL) or anti-adalimumab Fabs (5 µg/mL) and 2.5% human serum.

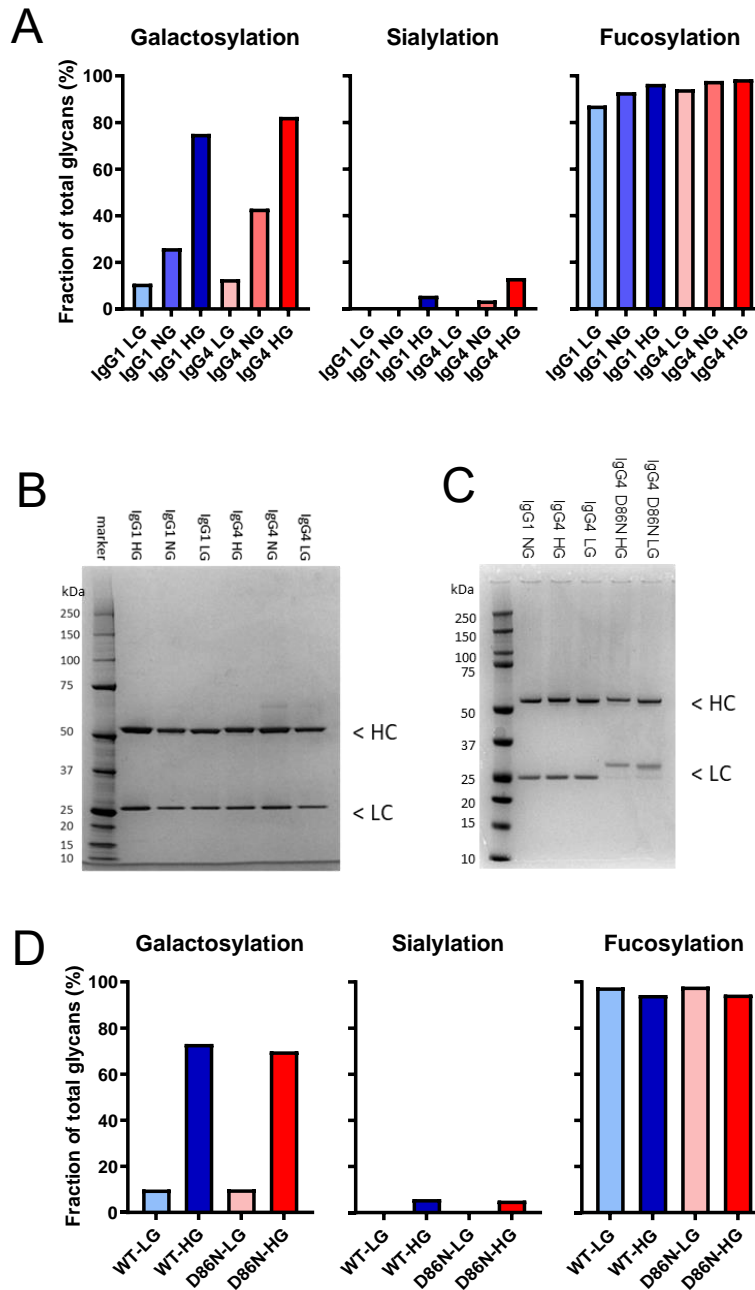

**Supplement figure 2. IgG1 and IgG4 glycovariants show similar glycosylation profiles.**

(A) Glycosylation patterns of glyco-engineered IgG1 and IgG4 Fc with high (HG), normal (NG) and low (LG) galactose composition. (B) IgG1 and IgG4 galactose-glycovariants and (C) IgG4 Fab variants were protein size separated via SDS-PAGE under reducing conditions. The molecular weight marker includes bands from 10 to 250 kDa. HC, heavy chain; LC, light chain. (D) Glycosylation patterns of IgG4 Fab variants, wild type IgG4, and a variant with D86N substitution in the light chain to introduce an additional glycosylation site, were profiled. Shown are fractions of galactose, sialic acid, and core fucose of total glycans.

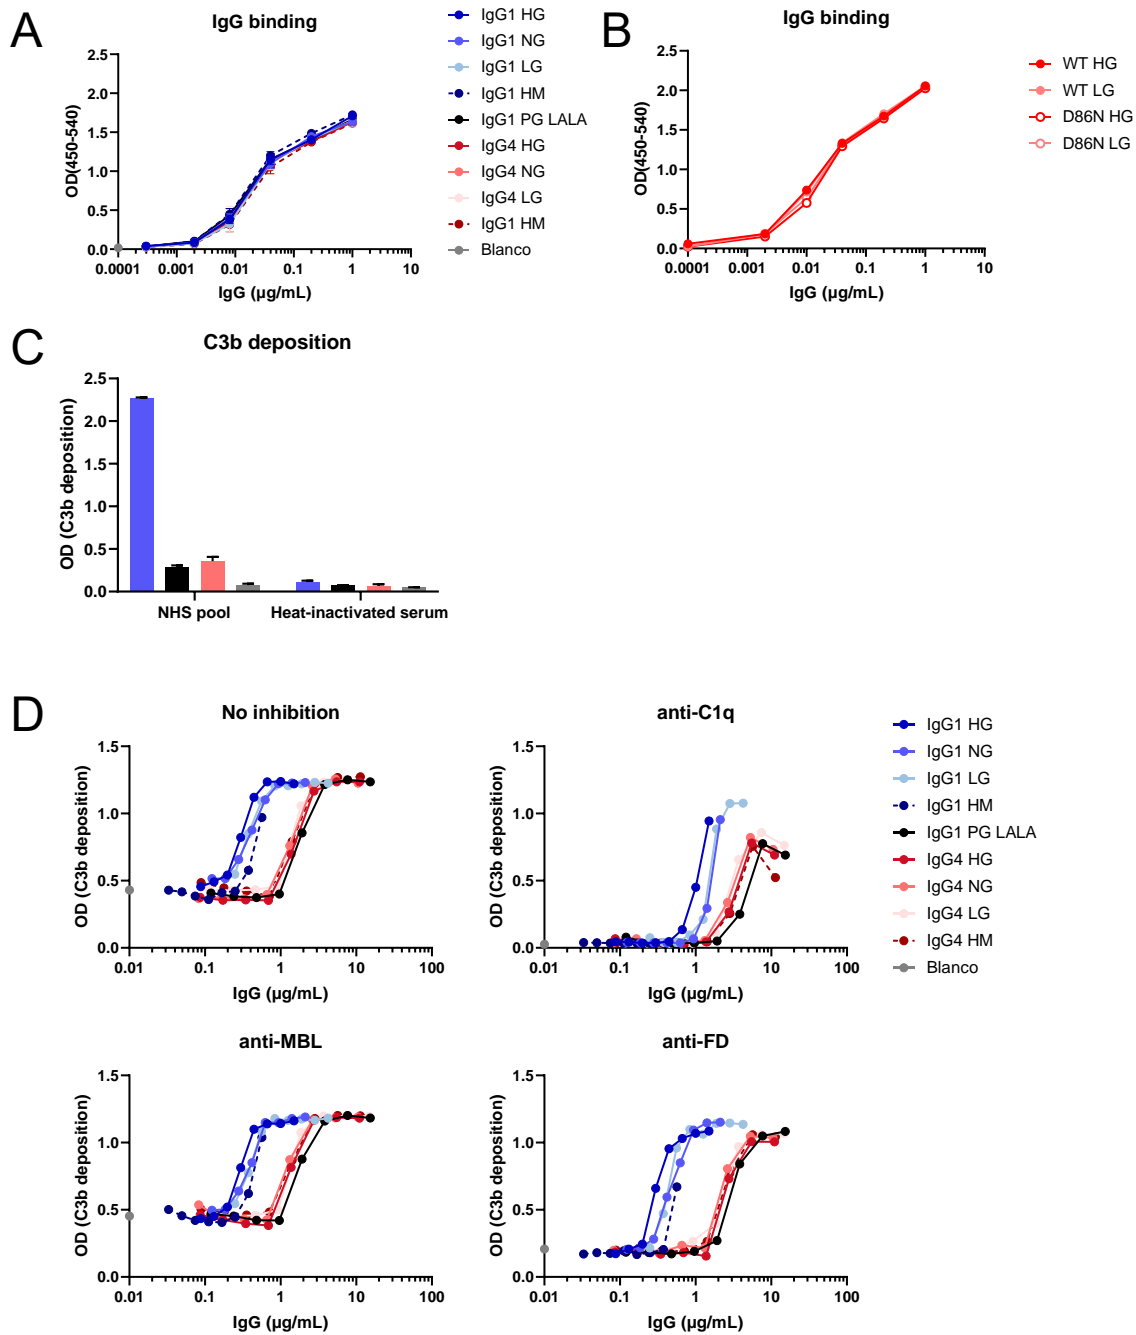

**Supplement figure 3. Controls for complement assays.** (A) IgG binding of all glycovariants and (B) Fab glycovariants was tested to identify concentration variations. (C) To test unspecific C3b deposition, anti-biotin IgG1, IgG4 and IgG1 PG-LALA (eliminated Fc-mediated effector functions) were tested in the presence of biotinylated human serum albumin (HSA; 240  $\mu\text{M}$  biotin) and 2.5% normal or heat-inactivated human serum. (D) C3b deposition by the glycovariants was also measured at 10% NHS and 37°C incubation.

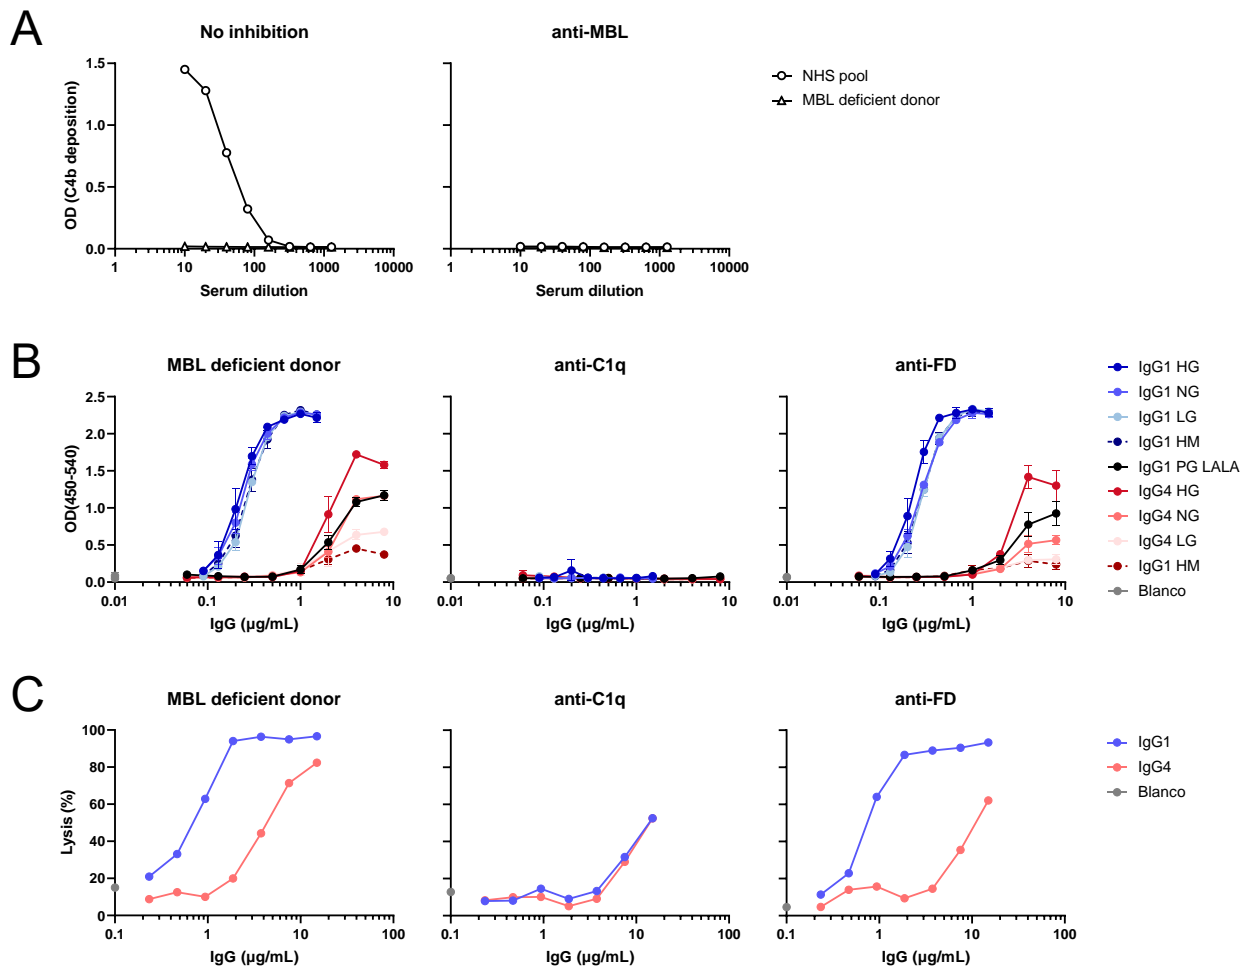

**Supplement figure 4. Inhibition of mannose-binding lectin (MBL) does not affect antibody-mediated complement activation.** (A) The activity of the lectin pathway was tested for a normal healthy serum pool and serum from a MBL deficient individual. Serial dilutions of both sera were incubated on mannan coated plates (50 µg/mL) in the absence or presence of MBL inhibitor, after which deposited C4b was detected. (B) C3b deposition induced by anti-biotin IgG1 and IgG4 glycovariants (high mannose (HM), high galactose (HG), normal galactose (NG) and low galactose (LG)), and IgG1 PG-LALA in the presence or absence of either C1q or FD inhibitors biotinylated human serum albumin (240 µM biotin) and 2.5% MBL-deficient serum. (C) Complement-mediated lysis of biotinylated human red blood cells (2.5 mM biotin) by IgG1 and IgG4 in presence or absence of either C1q, MBL, or FD inhibitors (full monoclonal antibodies and Fab fragments) and 10% MBL-deficient serum.
